# Supplementary material for: Quick tips for creating effective and impactful biological pathways using the Systems Biology Graphical Notation
Source: PLoS Comput Biol. 2018 Feb 15;14(2):e1005740. doi: 10.1371/journal.pcbi.1005740 (PMC5813898; doi:10.1371/journal.pcbi.1005740)
Supplement: S1 Table — This table provides a list of links that are useful for working with the SBGN standard. SBGN, Systems Biology Graphical Notation. (XLSX) [file pcbi.1005740.s001.xlsx]

## Sheet: Sheet1
S1 Table. List of useful links on the SBGN standard.
Description	Link	Accession date
SBGN webpage	http://sbgn.github.io/sbgn/	2017-07-21
Reference cards with SBGN symbols for all three languages	http://sbgn.github.io/sbgn/templates	2017-07-21
SBGN specifications	http://sbgn.github.io/sbgn/specifications	2017-07-21
SBGN PD L1 V1.3 specification	https://doi.org/10.2390/biecoll-jib-2015-263	2017-07-21
SBGN ER L1 V2.0 specification	https://doi.org/10.2390/biecoll-jib-2015-264	2017-07-21
SBGN AF L1 V1.2 specification	http://doi.org/10.2390/biecoll-jib-2015-265	2017-07-21
SBGN contact to mailing lists	http://sbgn.github.io/sbgn/contact	2017-07-21
List of software supporting SBGN	http://sbgn.github.io/sbgn/software_support/	2017-07-21
Development of SBGN (github wiki)	https://github.com/sbgn/sbgn/wiki	2017-07-21
Other related resources
The COMBINE community	http://co.mbine.org/	2017-07-21
SBGN bricks	http://sbgnbricks.sourceforge.net/	2017-07-23
SBGN bricks paper	http://dx.doi.org/10.1016/j.tibtech.2012.08.003	2017-07-23
